# Supplementary material for: PARP11 inhibition inactivates tumor-infiltrating regulatory T cells and improves the efficacy of immunotherapies
Source: PubMed Central journal article supplement — Cell Rep Med. 2024 Jul 16;5(7):101649. doi: 10.1016/j.xcrm.2024.101649 (PMC11293321; doi:10.1016/j.xcrm.2024.101649), 2024-07-16
Supplement: mmc1.pdf [file mmc1.pdf]

**Cell Reports Medicine, Volume 5**

**Supplemental information**

**PARP11 inhibition inactivates tumor-infiltrating  
regulatory T cells and improves  
the efficacy of immunotherapies**

**Raghavendra Basavaraja, Hongru Zhang, Ágnes Holczbauer, Zhen Lu, Enrico Radaelli, Charles-Antoine Assenmacher, Subin S. George, Vamshidhar C. Nallamala, Daniel P. Beiting, Mirella L. Meyer-Ficca, Ralph G. Meyer, Wei Guo, Yi Fan, Andrew J. Modzelewski, Vladimir S. Spiegelman, Michael S. Cohen, and Serge Y. Fuchs**

**Cell Reports Medicine**

**Supplemental information**

**PARP11 inhibition inactivates tumor-infiltrating regulatory  
T cells and improves the efficacy of immunotherapies.**

**Raghavendra Basavaraja, Hongru Zhang, Ágnes Holczbauer, Zhen Lu, Enrico Radaelli,  
Charles-Antoine Assenmacher, Subin S. George, Vamshidhar C. Nallamala, Daniel P.  
Beiting, Mirella L. Meyer-Ficca, Ralph G. Meyer, Wei Guo, Yi Fan, Andrew J.  
Modzelewski, Vladimir S. Spiegelman, Michael S. Cohen, and Serge Y. Fuchs**

A

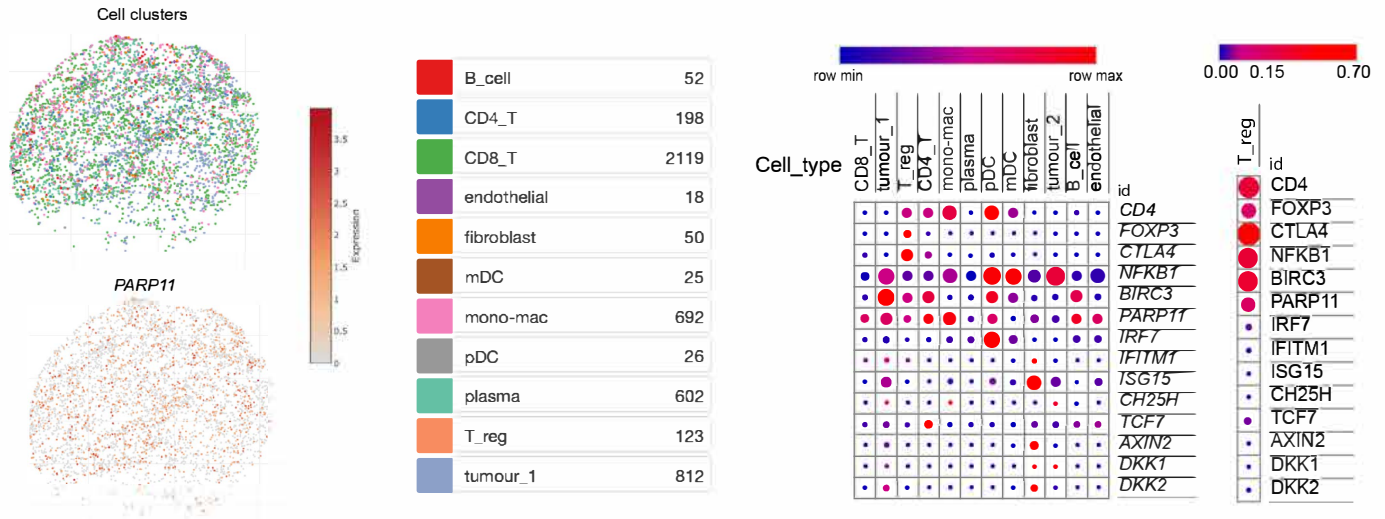

B

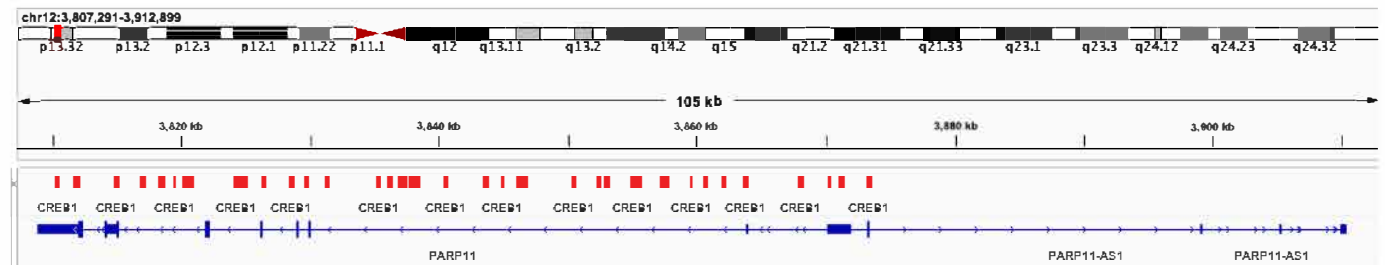

C

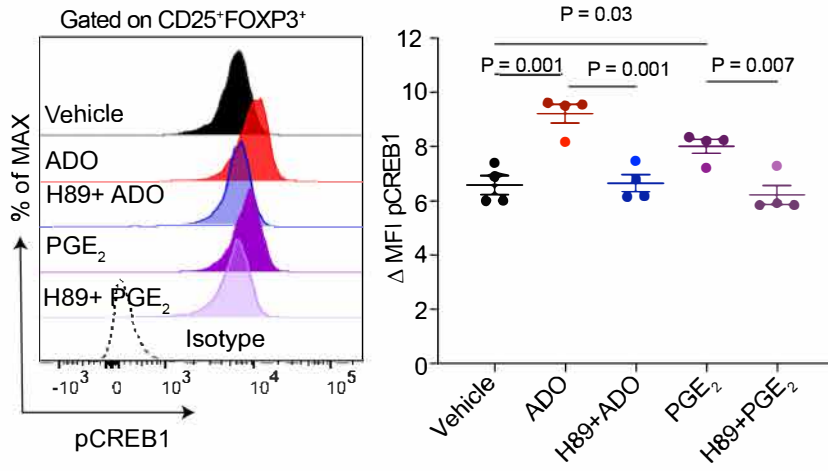

D

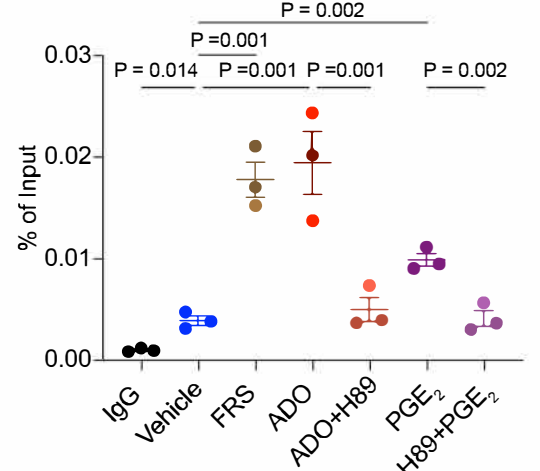

E

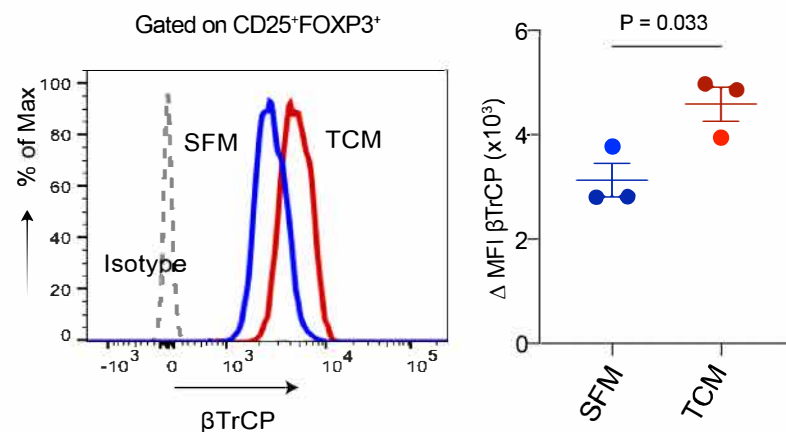

F

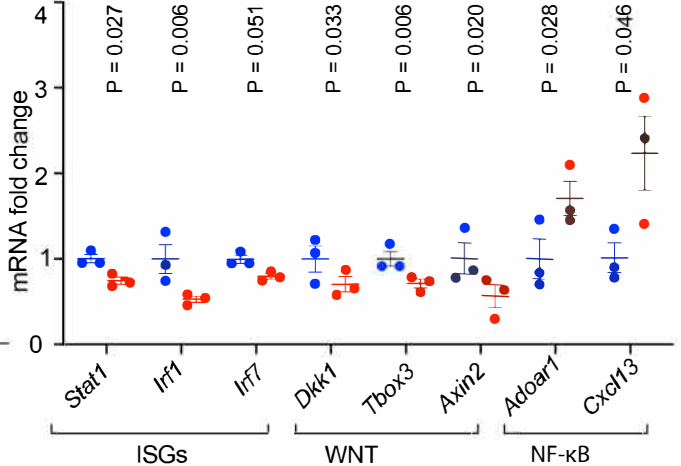

**Figure S1. Expression of PARP11 is upregulated in TI-Tregs and associated with failure of ICB therapies related to Figure 1.**

- A. Color-coded representation of snRNA-seq profiles across various cell types with differential *PARP11* expression. Intensity of color corresponds to *PARP11* expression levels. Accompanying dot plots detail the expression of key genes in NF- $\kappa$ B, type I interferon, and Wnt pathways. Dot size reflects gene expression level, while color intensity indicates the proportion of cells expressing each gene within the clusters.
- B. Prediction of CREB1 binding sites on *PARP11* DNA sequence using Gene Transcription Regulation Database (GTRD).
- C. Levels of phosphorylated CREB1 in induced T regulatory cells (iTregs) following treatment with adenosine (ADO; 1mM), prostaglandin E2 (PGE<sub>2</sub>; 1 $\mu$ M), and their combinations with or without the PKA inhibitor H89 (10 $\mu$ M) for 3h. (n=4).
- D. ChIP-qPCR analysis of phosphor-CREB1 binding to *Parp11* promoter in iTreg cells following treatment with forskolin (10 $\mu$ M), adenosine (ADO; 1mM), prostaglandin E2 (PGE<sub>2</sub>; 1 $\mu$ M), and their combinations with or without the PKA inhibitor H89 (10 $\mu$ M) for 1h (n=3).
- E. Levels of  $\beta$ TrCP in iTregs treated with either B16F10 tumor conditioned media (TCM, red dots) or with serum free media (SFM, blue dots) for 6h (n=3).
- F. qPCR analysis of the type I interferon pathway (*Stat1*, *Irf1* and *Irf7*), Wnt pathway (*Dkk1*, *TBox3* and *Axin2*) and NF- $\kappa$ B pathway (*Adoar1* and *Cxcl13*) genes in iTregs exposed with TCM (red dots) or SFM (blue dots) for 24h (n=3).

Data are presented as mean  $\pm$  SEM. Statistical analysis was performed using 1-way ANOVA with Tukey's multiple-comparison test (C, D) or 2-tailed unpaired Students' t test (E, F).

A

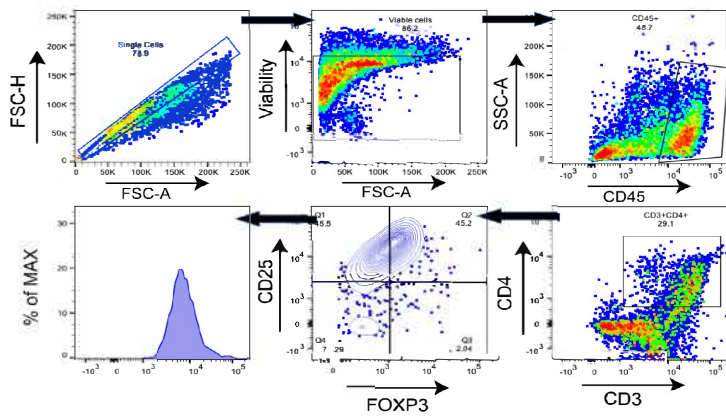

B

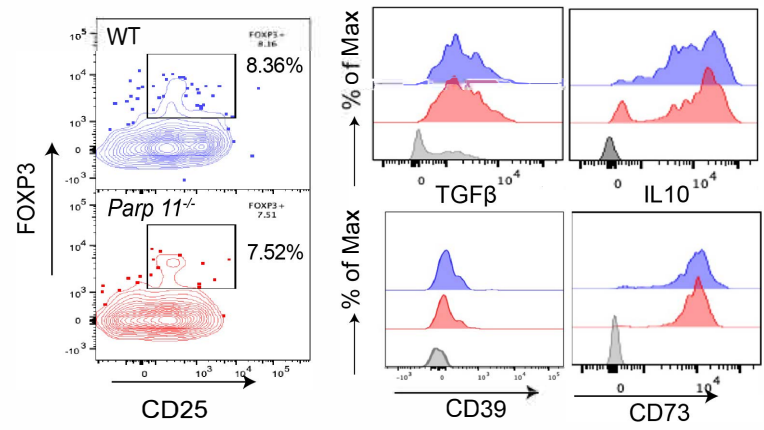

C

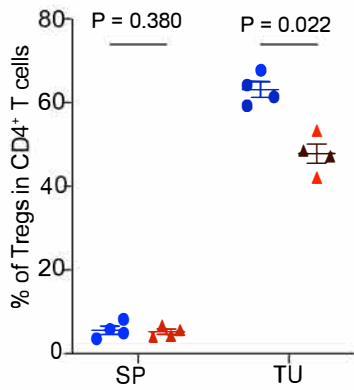

D

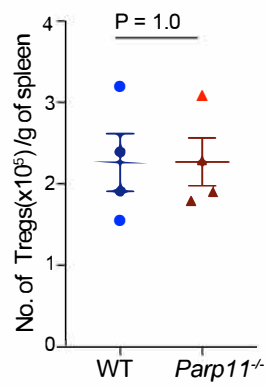

E

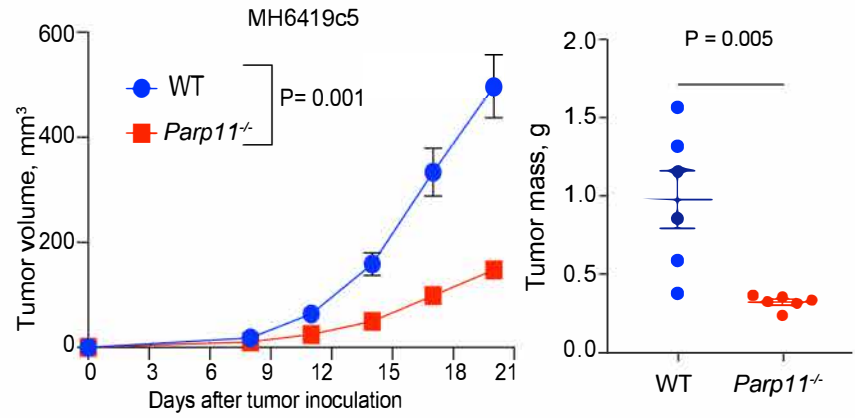

F

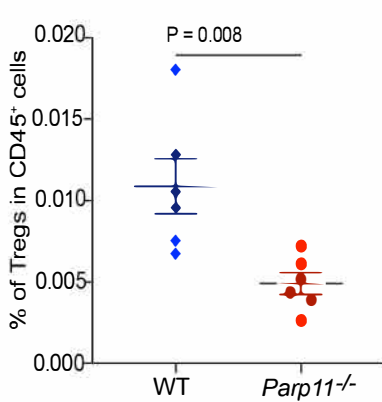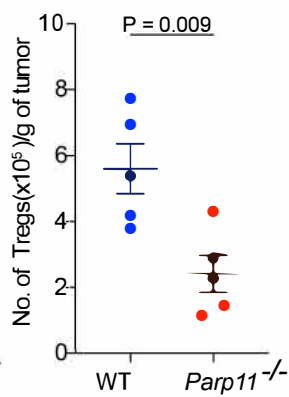

G

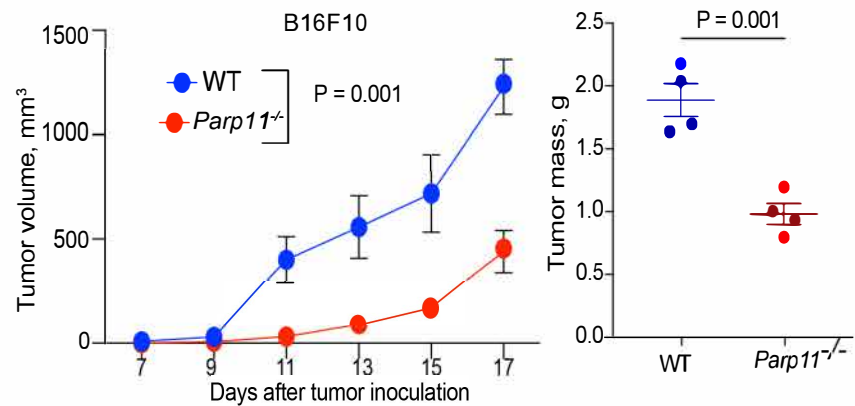

H

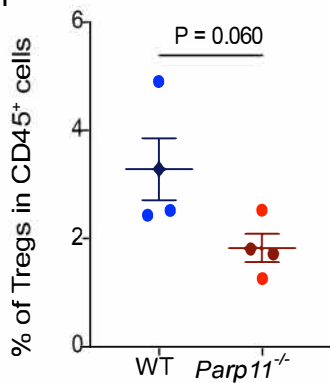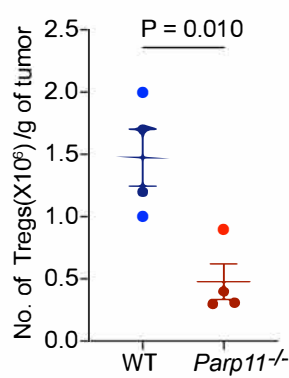

**Figure S2. PARP11 supports immune suppressive activities of TI-Tregs, related to Figure 2.**

- A.** Flow cytometry gating strategy in analysis of cellular components of splenic or tumor tissues.
- B.** Frequencies of Tregs (% of CD4<sup>+</sup> T cells) and levels of TGF $\beta$ , IL10, CD39, CD73 in Tregs isolated from spleens of naïve WT or *Parp11* knockout mice.
- C.** Frequencies of Tregs (% of CD4<sup>+</sup> T cells) isolated from spleens and MC38 tumors of mice described in **Figure 2A** (n=4).
- D.** Numbers (per gram of tissue) of SP-Tregs from MC38 tumor-bearing mice described in **Figure 2A** (n=4).
- E.** Volume and mass (on Day 21) of s.c MH6419c5 tumors growing in WT or *Parp11* knockout mice (n=6).
- F.** Frequencies (% of CD45<sup>+</sup> cells) and numbers (per gram of tissue) of Tregs isolated from s.c MH6419c5 tumors described in panel **E**.
- G.** Volume and mass (Day 17) of s.c B16F10 tumors growing in WT or *Parp11* knockout mice (n=4).
- H.** Frequencies (% of CD45<sup>+</sup> cells) and numbers (per gram of tissue) of Tregs isolated from s.c B16F10 tumors described in panel **G**.

Data are presented as mean  $\pm$  SEM. Statistical analysis was performed using 2-tailed unpaired Students' t test (C-H) or 1-way ANOVA with Tukey's multiple-comparison test (E and G).

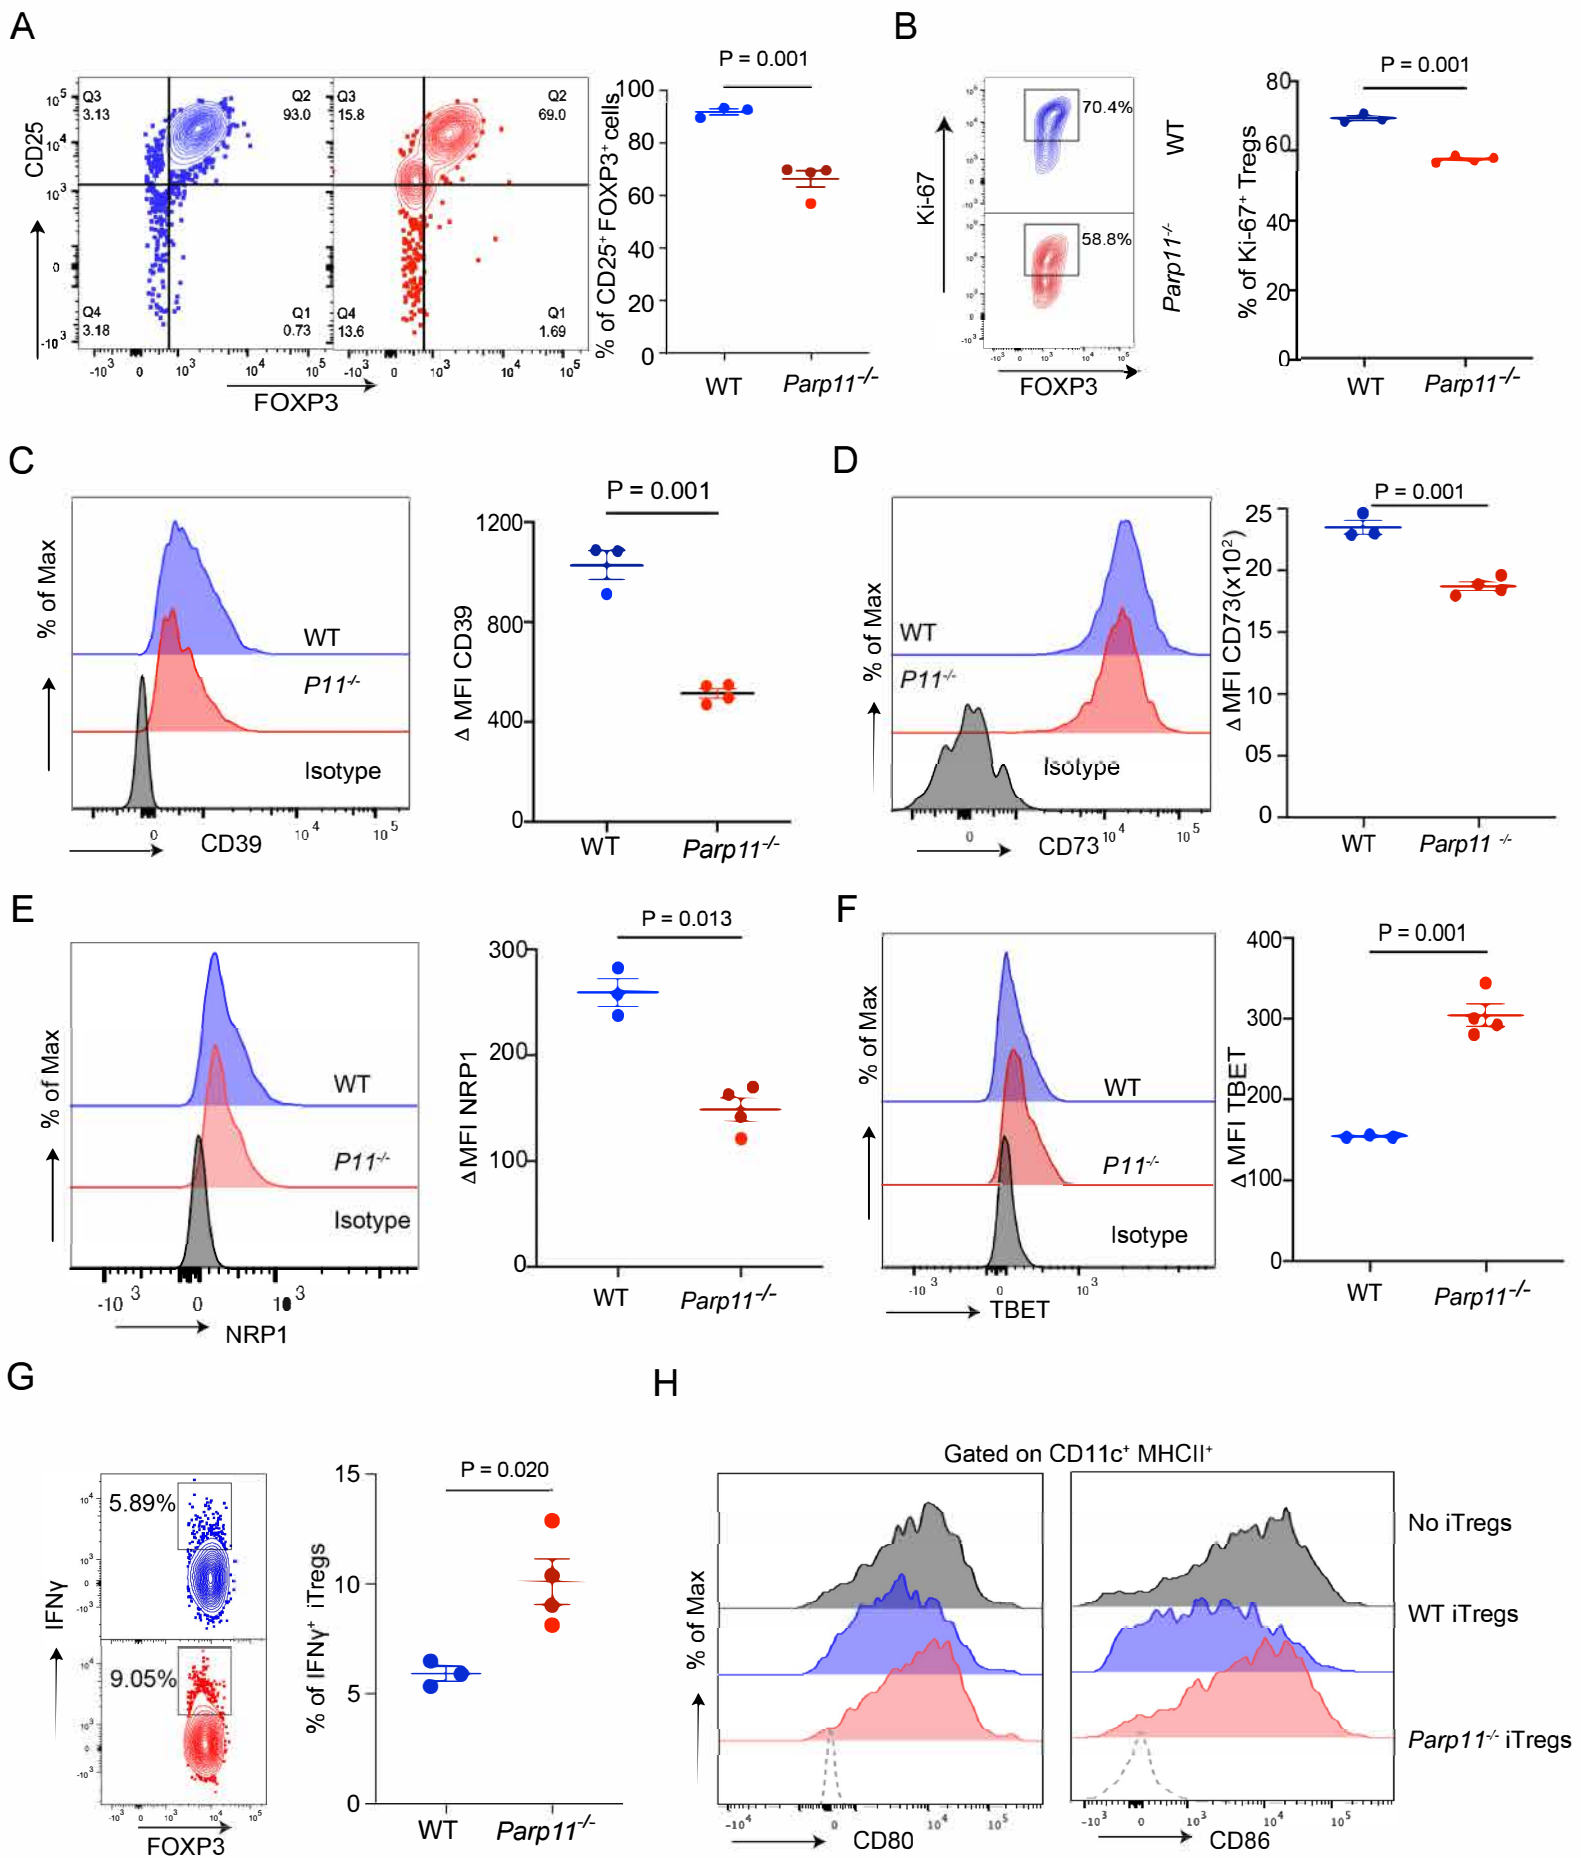

**Figure S3. Loss of PARP11 is associated with reduced immunoregulatory functions of Tregs, related to Figure 3.**

- A.** Frequencies of CD25<sup>+</sup>FOXP3<sup>+</sup> cells in CD4<sup>+</sup> iTreg cells within the WT or *Parp11*<sup>-/-</sup> mice (n=3-4).
- B.** Flow cytometry analysis of percentage of Ki-67<sup>+</sup> Tregs from experiment indicated in panel **A**.
- C-F.** Levels of CD39, CD73, NRP1, and TBET in WT or PARP11-null iTregs described in panel **A**.
- G.** Flow cytometry analysis of percentage of IFN $\gamma$ <sup>+</sup> iTregs from experiment described in panel **A**.
- H.** Analysis of cell surface levels of CD80 and CD86 on dendritic cells described in **Figure 3F** (n=3).

Data are presented as mean  $\pm$  SEM. Statistical analysis was performed using 2-tailed unpaired Students' t test (**A-G**).



**A**

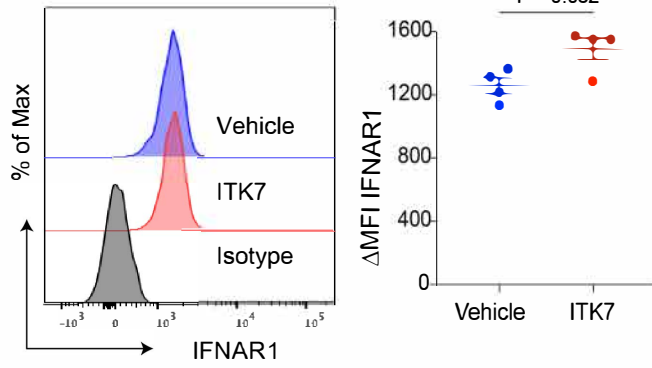

**C**

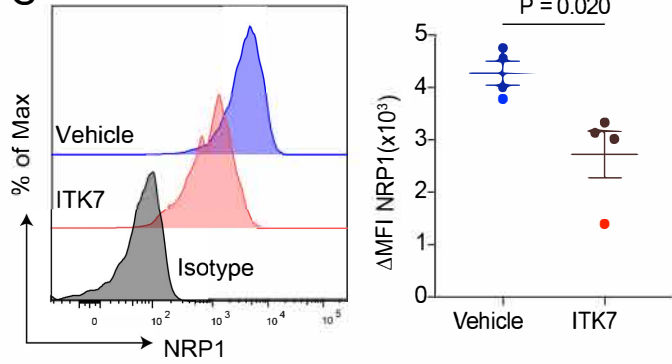

**D**

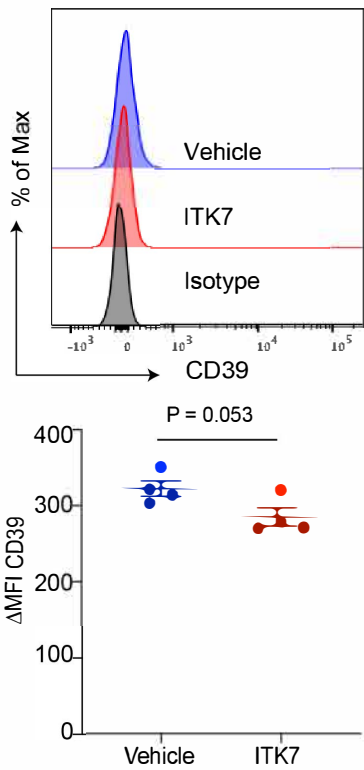

**B**

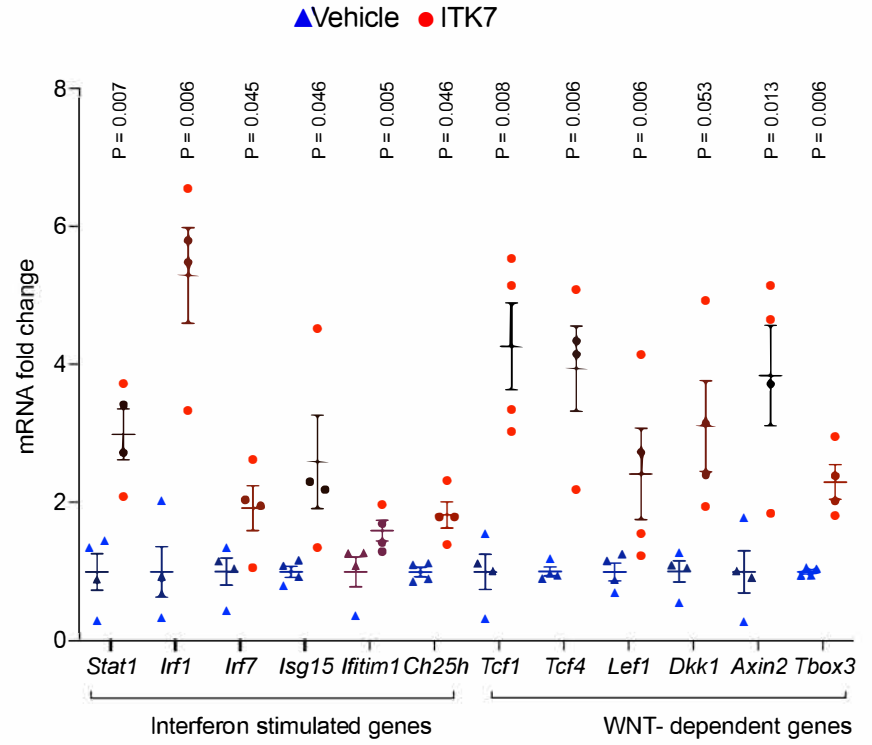

**E**

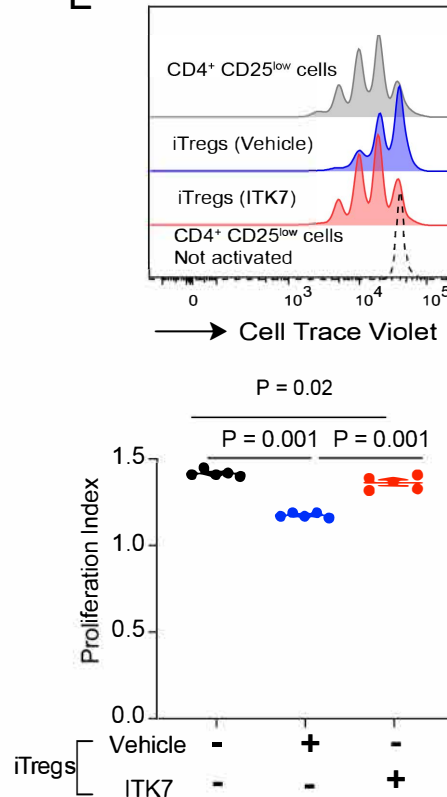

**Figure S4. PARP11 specific inhibitor ITK7 mimics the loss of PARP11 phenotype on Tregs suppressive function, related to Figure 4.**

- A.** Flow cytometry analysis of cell surface IFNAR1 on iTregs treated with vehicle or ITK7 (5nM, 48h; n=4).
- B.** qPCR analysis of IFN1 pathway (*Stat1*, *Irf1* and *Irf7*) and WNT pathway (*Dkk1*, *TBox3* and *Axin2*) genes in WT iTregs treated with vehicle or ITK7 (5nM, 24h; n=4).
- C.** Flow cytometry analysis of cell surface NRP1 in iTregs described in panel **A**.
- D.** Flow cytometry analysis of cell surface CD39 in iTregs described in panel **A**.
- E.** Flow cytometry analysis and quantification of CD4<sup>+</sup>CD25<sup>low</sup> T cell proliferation index in vitro. Activated WT CD8<sup>+</sup> T cells stained with CellTrace Violet were co-cultured for 72h with or without WT iTreg cells (Treg:CD4=1:2) pre-treated or not with ITK7 (5nM, 48h; n=5).

Data are presented as mean  $\pm$  SEM. Statistical analysis was performed using 2-tailed unpaired Students' t test (**A-D**) or 1-way ANOVA with Tukey's multiple-comparison test (**E**).

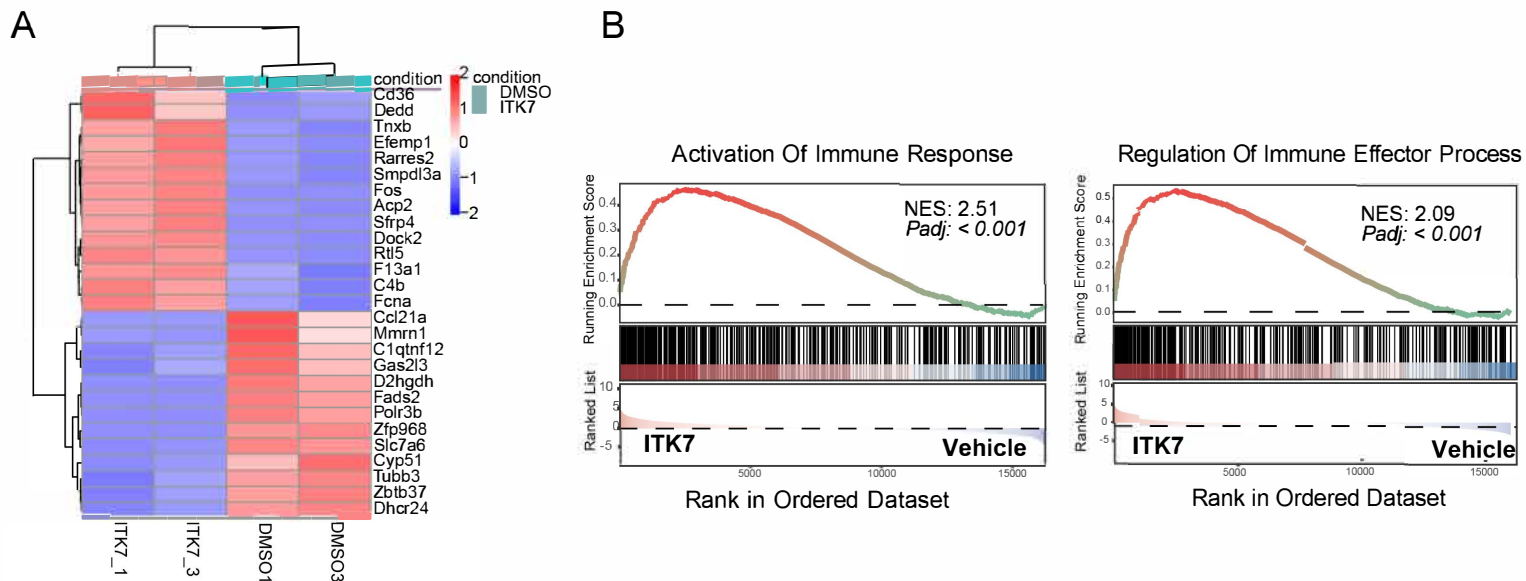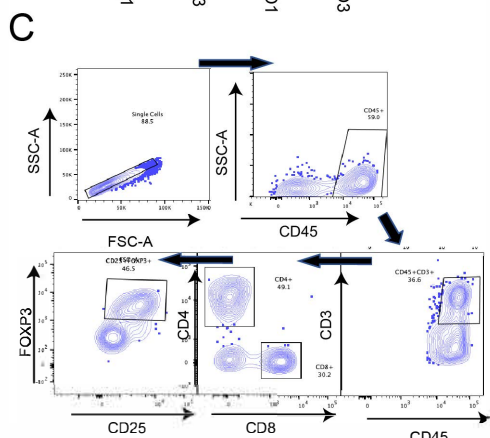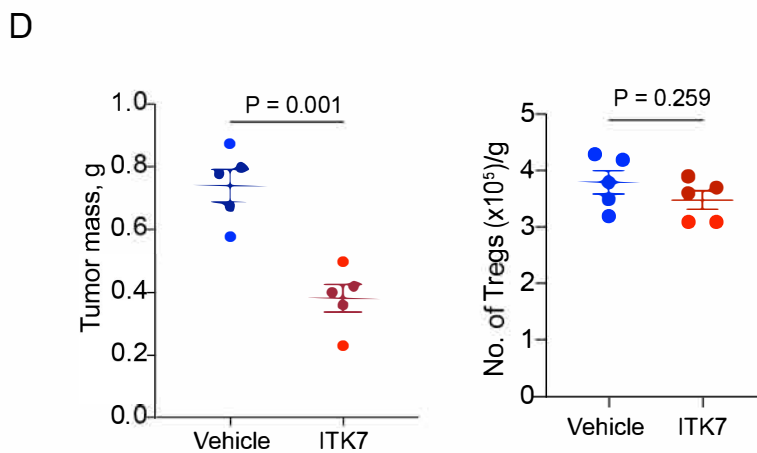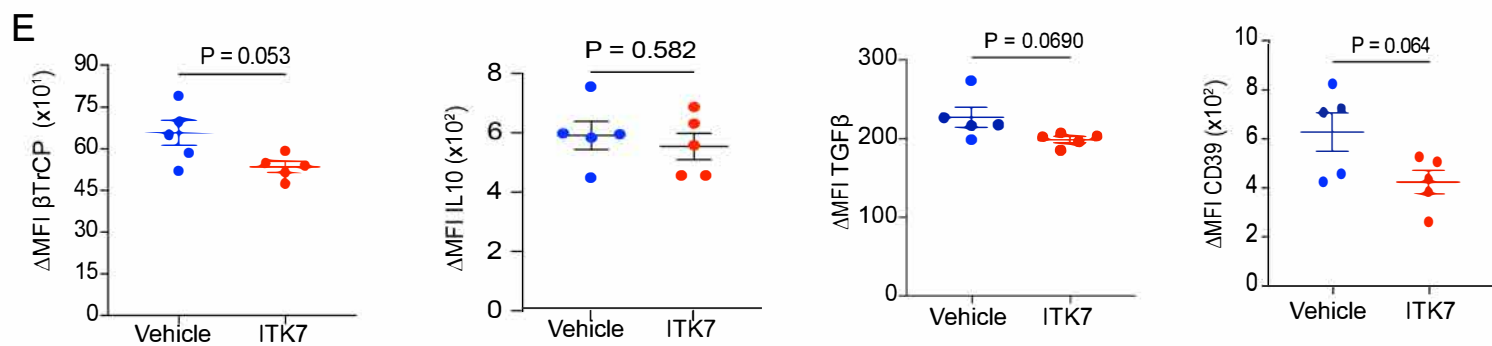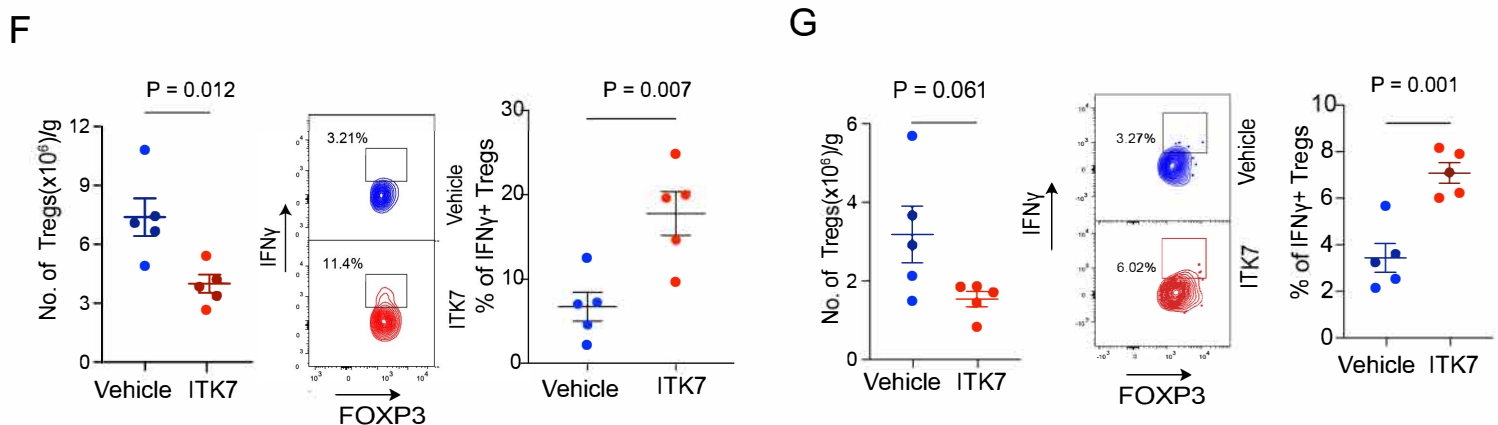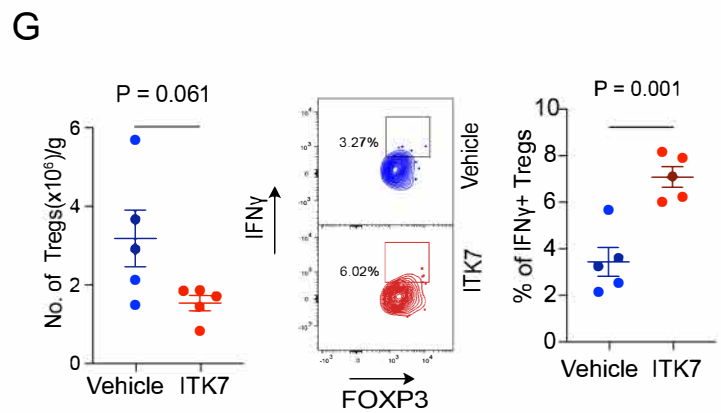

**Figure S5. Selective PARP11 inhibitor ITK7 disrupts the immune suppressive activities of TI-Tregs and activates the immune pathways in the TME, related to Figure 5.**

- A.** Heatmap for differentially expressed genes in MC38 s.c. tumors from mice administered with ITK7 described in panel Figure 5A (n=2).
- B.** GSEA and KEGG plots of indicated signatures detected in MC38 tumors described in panel 5A.
- C.** The gating strategy for flow cytometry analysis of the effects of ITK7 treatment (as described in **Figure 5D**) on TME immune infiltration and status of Tregs and CD8<sup>+</sup> T cells.
- D.** Mass of MC38 tumors and absolute numbers (per gram of spleen) Tregs isolated from spleens from MC38 tumor-bearing mice described in **Figure 5D**.
- E.** Levels of  $\beta$ -TrCP, IL10, TGF $\beta$  and CD39 in Tregs isolated from spleens from MC38 tumor-bearing mice described in **Figure 5D**.
- F.** Absolute numbers and IFN- $\gamma$  expression of TI-Treg isolated from subcutaneous MH6499c4 tumors (n=5).
- G.** Absolute numbers and IFN- $\gamma$  expression of TI-Treg isolated from mouse orthotopic pancreatic MH6499c4 tumors (n=5).

Data are presented as mean  $\pm$  SEM. Statistical analysis was performed using 2-tailed unpaired Students' t test (**D-G**).

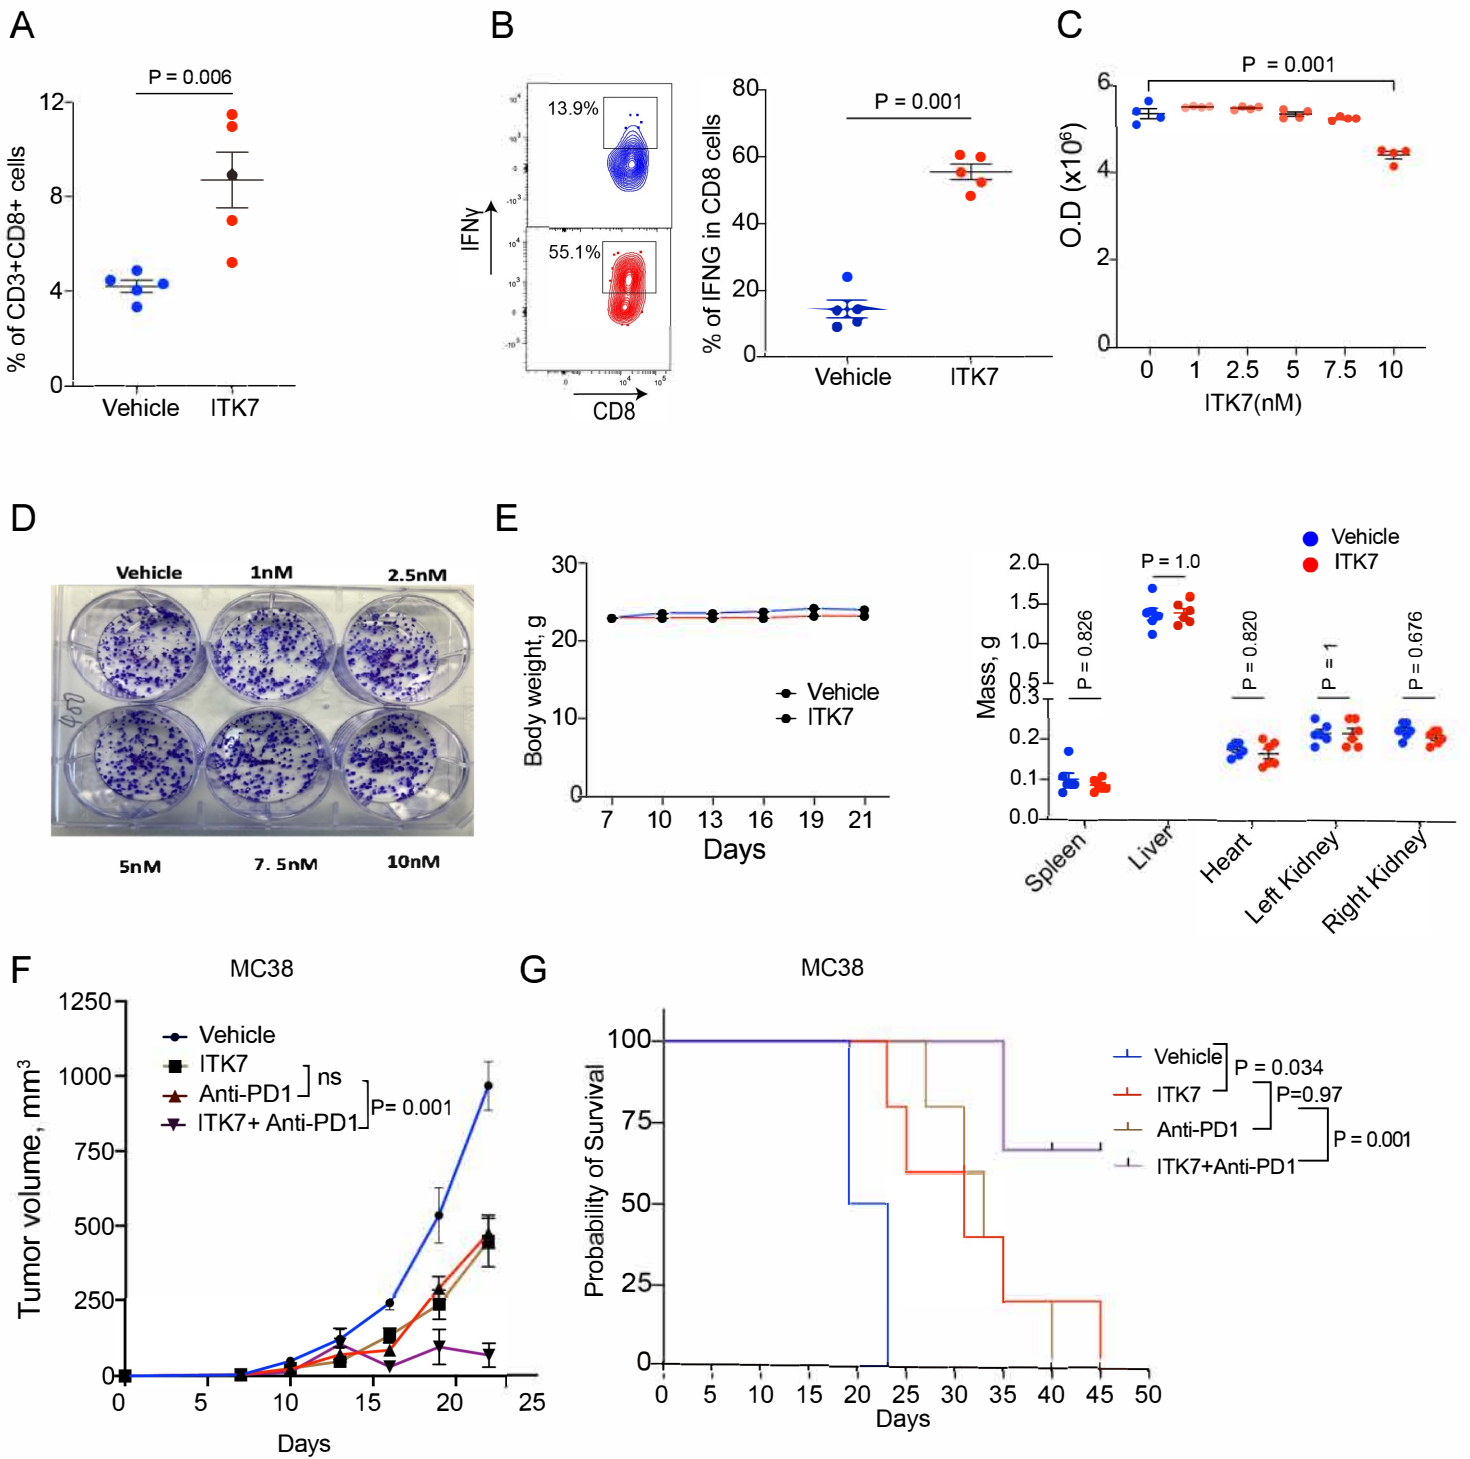

**Figure S6. ITK7 reactivates CTLs and elicits anti-tumor effects alone and in combination with immunotherapies, related to Figure 6.**

- A.** Percentage of CD3<sup>+</sup>CD8<sup>+</sup> cells in CD45<sup>+</sup> cells isolated from subcutaneous MH6499c4 tumors grown in mice treated or not with ITK7 (100µg/mouse) as in **Figure 6E** (n=5).
- B.** Flow cytometry analysis of percentage of IFNγ<sup>+</sup> CD3<sup>+</sup>CD8<sup>+</sup> cells described in panel **A**.
- C.** Proliferation of MC38 cells in the presence of indicated ITK concentrations *in vitro* as assessed by the CellTiter-Glo® luminescence assay (n=4).
- D.** Colony formation by MC38 cells treated either with vehicle or indicated of ITK7 *in vitro* (n=2).
- E.** Body weight and the weight of indicated internal organs from s.c. MC38 tumor-bearing mice administered with ITK7 (100 µg/mouse i.p) on days 7, 10, 13, 16 and 19 after tumor inoculation (n=6).
- F.** Volume of s. c MC38 tumors growing in syngeneic WT mice treated with anti-PD1 (200µg/mouse) and ITK7 (100µg/mouse) as indicated (n=5).
- G.** The Kaplan-Meier survival analysis of MC38 tumor-bearing described in panel **F**. Mice were sacrificed when the tumor volume reached 1000mm<sup>3</sup> (n=5).

Data are presented as mean ± SEM. Statistical analysis was using 2-tailed Students' t test (**A-E**) or 1-way ANOVA with Tukey's multiple-comparison Test (**F**) or log rank test (**G**).

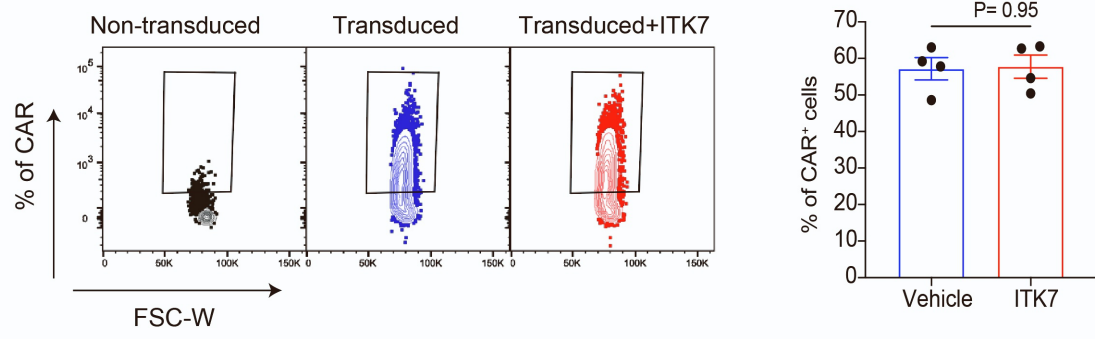

**Figure S7. ITK7 improves the efficacy of CAR T therapy, related to Figure 7.**  
Percentage of CAR<sup>+</sup> T cells treated with vehicle or ITK7 (10nM) for 72h (n=4).  
Data are presented as mean ± SEM. Statistical analysis was using 2-tailed Students' t test.

**Supplementary Table 2. List of oligonucleotides for qPCR, ChIP- qPCR and Genotyping, related to STAR METHODS.**

| Primers (5' - 3')     | Forward                  | Reverse                 |
|-----------------------|--------------------------|-------------------------|
| Mouse $\beta$ -Actin  | TTCCAGCCTTCCTTCTTGGG     | TGTTGGCATAGAGGTCTTTACGG |
| Mouse <i>Parp11</i>   | GCAGATGAATCTTGTCACCTGGG  | TGGCCTCATTCTCACAGATGTA  |
| Mouse <i>Btrc</i>     |                          | TCTCTTGGTTTATGCAAAGCCTG |
| Mouse <i>Stat1</i>    | CGCGCATGCAACTGGCATATAACT | AAGCTCGAACCCTGTGACATCCT |
| Mouse <i>Irf3</i>     | GAGAGCCGAACGAGGTTTCAG    | CTTCCAGGTTGACACGTCCG    |
| Mouse <i>Irf7</i>     | GAGACTGGCTATTGGGGGAG     | GACCGAAATGCTTCCAGGG     |
| Mouse <i>Isg15</i>    | GGTGTCCGTGACTAACTCCAT    | TGGAAAGGGTAAGACCGTCCT   |
| Mouse <i>Ch25h</i>    | TGCTACAACGGTTCGGAGC      | AGAAGCCCACGTAAGTGATGAT  |
| Mouse <i>Axin2</i>    | TGACTCTCCTTCCAGATCCCA    | TGCCACACTAGGCTGACA      |
| Mouse <i>Lef1</i>     | TGTTTATCCCATCACGGGTGG    | CATGGAAGTGTGCGCTGACAG   |
| Mouse <i>Dickkopf</i> | GACCTGCTACGAGACCTGGA     | CTGGAGAGGGTATGGTTGCC    |
| Mouse <i>Tcf4</i>     | CGAAAAGTTCCTCCGGGTTTG    | CGTAGCCGGGCTGATTCAT     |
| Mouse <i>Tbax3</i>    | ACTCGGGGTCGGAAGTAA       | GGAGGGGGCGATTTTGTTTTT   |
| Mouse <i>Tcf1</i>     | TGAATCACCACCCGGAATGG     | CTGGGCCAACTTCACATCCC    |
| Mouse <i>Nfkb1</i>    | ATGGCAGACGATGATCCCTAC    | TGTTGACAGTGGTATTTCTGGTG |
| Mouse <i>Il1b</i>     | GCAACTGTTTCTGAACTCAACT   | ATCTTTTGGGGTCCGTCAACT   |
| Mouse <i>Adoar1</i>   | TGTGCCCGGAAATGTACTGG     | TCTGTGGCCCAATGTTGATAAG  |
| Mouse <i>Cxcl10</i>   | CCAAGTGCTGCCGTCATTTTC    | GGCTCGCAGGGATGATTTCAA   |
| Mouse <i>Cxcl13</i>   | GGCCACGGTATTCTGGAAGC     | GGGCGTAACTTGAATCCGATCTA |

**ChIP- qPCR**

|                     |                      |                      |
|---------------------|----------------------|----------------------|
| Mouse <i>Parp11</i> | CGTAGGTTCTGCATGGAGGA | AAACTCGCTCCGCCTCTATG |
|---------------------|----------------------|----------------------|

**Genotyping**

|                                     |                                 |                                 |
|-------------------------------------|---------------------------------|---------------------------------|
| <i>Parp11</i> <sup>-/-</sup>        |                                 |                                 |
| <i>Parp11</i> _TU                   | CAT GCT CAT GGA AAC CTG GAA AG  | CCC TGT CTA AGC TCA CCA CTG     |
| <i>Parp11</i> _Neoln                | TTC GGC TAT GAC TGG GCA CAA CAG | TAC TTT CTC GGC AGG AGC AAG GTG |
| <i>Foxp3</i> <sup>YFP-Cre</sup>     |                                 |                                 |
| <i>Foxp3</i> <sup>YFP-Cre</sup> WT  | CAG TGT GGA CCG TAG ATG AA      | AGT GCT GTT GCT GTG TAA GG      |
| <i>Foxp3</i> <sup>YFP-Cre</sup> Mut | AGGATGTGAGGGACTACCTCCTGTA       | TCCTTCACTCTGATCTGGCAATTT        |
